# Supplementary material for: Application of insect-proof nets in pesticide-free rice creates an altered microclimate and differential agronomic performance
Source: PeerJ. 2018 Dec 21;6:e6135. doi: 10.7717/peerj.6135 (PMC6305117; doi:10.7717/peerj.6135)
Supplement: Data S1 [file peerj-06-6135-s001.xlsx]

## Sheet: Fig. 1-Daily solar radiation 
Date	Time	OFC-solar radiation	IPNC-solar radiation
2011-09-09	00:20:00	1.2	0.6
2011-09-09	00:50:00	1.2	0.6
2011-09-09	01:20:00	1.2	0.6
2011-09-09	01:50:00	1.2	0.6
2011-09-09	02:20:00	1.2	0.6
2011-09-09	02:50:00	1.2	0.6
2011-09-09	03:20:00	1.2	0.6
2011-09-09	03:50:00	1.2	0.6
2011-09-09	04:20:00	1.2	0.6
2011-09-09	04:50:00	1.2	0.6
2011-09-09	05:20:00	1.2	0.6
2011-09-09	05:50:00	3.7	0.6
2011-09-09	06:20:00	36.2	10.6
2011-09-09	06:50:00	116.2	41.9
2011-09-09	07:20:00	233.7	78.1
2011-09-09	07:50:00	271.2	69.4
2011-09-09	08:20:00	203.7	69.4
2011-09-09	08:50:00	213.7	69.4
2011-09-09	09:20:00	218.7	76.9
2011-09-09	09:50:00	483.7	175.6
2011-09-09	10:20:00	381.2	93.1
2011-09-09	10:50:00	541.2	219.4
2011-09-09	11:20:00	293.7	35.6
2011-09-09	11:50:00	446.2	180.6
2011-09-09	12:20:00	301.2	56.9
2011-09-09	12:50:00	126.2	31.9
2011-09-09	13:20:00	306.2	139.4
2011-09-09	13:50:00	403.7	136.9
2011-09-09	14:20:00	298.7	96.9
2011-09-09	14:50:00	181.2	61.9
2011-09-09	15:20:00	116.2	30.6
2011-09-09	15:50:00	98.7	24.4
2011-09-09	16:20:00	86.2	18.1
2011-09-09	16:50:00	51.2	13.1
2011-09-09	17:20:00	26.2	4.4
2011-09-09	17:50:00	6.2	0.6
2011-09-09	18:20:00	1.2	0.6
2011-09-09	18:50:00	1.2	0.6
2011-09-09	19:20:00	1.2	0.6
2011-09-09	19:50:00	1.2	0.6
2011-09-09	20:20:00	1.2	0.6
2011-09-09	20:50:00	1.2	0.6
2011-09-09	21:20:00	1.2	0.6
2011-09-09	21:50:00	1.2	0.6
2011-09-09	22:20:00	1.2	0.6
2011-09-09	22:50:00	1.2	0.6
2011-09-09	23:20:00	1.2	0.6
2011-09-09	23:50:00	1.2	0.6
2011-09-10	00:20:00	1.2	0.6
2011-09-10	00:50:00	1.2	0.6
2011-09-10	01:20:00	1.2	0.6
2011-09-10	01:50:00	1.2	0.6
2011-09-10	02:20:00	1.2	0.6
2011-09-10	02:50:00	1.2	0.6
2011-09-10	03:20:00	1.2	0.6
2011-09-10	03:50:00	1.2	0.6
2011-09-10	04:20:00	1.2	0.6
2011-09-10	04:50:00	1.2	0.6
2011-09-10	05:20:00	1.2	0.6
2011-09-10	05:50:00	1.2	0.6
2011-09-10	06:20:00	3.7	0.6
2011-09-10	06:50:00	8.7	3.1
2011-09-10	07:20:00	18.7	4.4
2011-09-10	07:50:00	51.2	15.6
2011-09-10	08:20:00	121.2	33.1
2011-09-10	08:50:00	108.7	29.4
2011-09-10	09:20:00	101.2	34.4
2011-09-10	09:50:00	91.2	11.9
2011-09-10	10:20:00	56.2	10.6
2011-09-10	10:50:00	103.7	30.6
2011-09-10	11:20:00	233.7	79.4
2011-09-10	11:50:00	198.7	43.1
2011-09-10	12:20:00	323.7	153.1
2011-09-10	12:50:00	431.2	144.4
2011-09-10	13:20:00	308.7	98.1
2011-09-10	13:50:00	253.7	61.9
2011-09-10	14:20:00	163.7	54.4
2011-09-10	14:50:00	161.2	39.4
2011-09-10	15:20:00	156.2	34.4
2011-09-10	15:50:00	191.2	36.9
2011-09-10	16:20:00	53.7	10.6
2011-09-10	16:50:00	101.2	21.9
2011-09-10	17:20:00	33.7	8.1
2011-09-10	17:50:00	43.7	16.9
2011-09-10	18:20:00	8.7	1.9
2011-09-10	18:50:00	1.2	0.6
2011-09-10	19:20:00	1.2	0.6
2011-09-10	19:50:00	1.2	0.6
2011-09-10	20:20:00	1.2	0.6
2011-09-10	20:50:00	1.2	0.6
2011-09-10	21:20:00	1.2	0.6
2011-09-10	21:50:00	1.2	0.6
2011-09-10	22:20:00	1.2	0.6
2011-09-10	22:50:00	1.2	0.6
2011-09-10	23:20:00	1.2	0.6
2011-09-10	23:50:00	1.2	0.6
2011-09-11	00:20:00	1.2	0.6
2011-09-11	00:50:00	1.2	0.6
2011-09-11	01:20:00	1.2	0.6
2011-09-11	01:50:00	1.2	0.6
2011-09-11	02:20:00	1.2	0.6
2011-09-11	02:50:00	1.2	0.6
2011-09-11	03:20:00	1.2	0.6
2011-09-11	03:50:00	1.2	0.6
2011-09-11	04:20:00	1.2	0.6
2011-09-11	04:50:00	1.2	0.6
2011-09-11	05:20:00	1.2	0.6
2011-09-11	05:50:00	1.2	0.6
2011-09-11	06:20:00	6.2	0.6
2011-09-11	06:50:00	18.7	6.9
2011-09-11	07:20:00	71.2	28.1
2011-09-11	07:50:00	141.2	43.1
2011-09-11	08:20:00	158.7	49.4
2011-09-11	08:50:00	228.7	91.9
2011-09-11	09:20:00	241.2	59.4
2011-09-11	09:50:00	446.2	216.9
2011-09-11	10:20:00	673.7	288.1
2011-09-11	10:50:00	676.2	164.4
2011-09-11	11:20:00	448.7	111.9
2011-09-11	11:50:00	451.2	169.4
2011-09-11	12:20:00	716.2	134.4
2011-09-11	12:50:00	318.7	75.6
2011-09-11	13:20:00	268.7	69.4
2011-09-11	13:50:00	198.7	39.4
2011-09-11	14:20:00	138.7	41.9
2011-09-11	14:50:00	111.2	29.4
2011-09-11	15:20:00	111.2	29.4
2011-09-11	15:50:00	103.7	26.9
2011-09-11	16:20:00	101.2	28.1
2011-09-11	16:50:00	31.2	6.9
2011-09-11	17:20:00	28.7	9.4
2011-09-11	17:50:00	16.2	3.1
2011-09-11	18:20:00	1.2	0.6
2011-09-11	18:50:00	1.2	0.6
2011-09-11	19:20:00	1.2	0.6
2011-09-11	19:50:00	1.2	0.6
2011-09-11	20:20:00	1.2	0.6
2011-09-11	20:50:00	1.2	0.6
2011-09-11	21:20:00	1.2	0.6
2011-09-11	21:50:00	1.2	0.6
2011-09-11	22:20:00	1.2	0.6
2011-09-11	22:50:00	1.2	0.6
2011-09-11	23:20:00	1.2	0.6
2011-09-11	23:50:00	1.2	0.6
2011-09-12	00:20:00	1.2	0.6
2011-09-12	00:50:00	1.2	0.6
2011-09-12	01:20:00	1.2	0.6
2011-09-12	01:50:00	1.2	0.6
2011-09-12	02:20:00	1.2	0.6
2011-09-12	02:50:00	1.2	0.6
2011-09-12	03:20:00	1.2	0.6
2011-09-12	03:50:00	1.2	0.6
2011-09-12	04:20:00	1.2	0.6
2011-09-12	04:50:00	1.2	0.6
2011-09-12	05:20:00	1.2	0.6
2011-09-12	05:50:00	1.2	0.6
2011-09-12	06:20:00	16.2	5.6
2011-09-12	06:50:00	76.2	30.6
2011-09-12	07:20:00	116.2	35.6
2011-09-12	07:50:00	203.7	65.6
2011-09-12	08:20:00	138.7	41.9
2011-09-12	08:50:00	186.2	53.1
2011-09-12	09:20:00	288.7	91.9
2011-09-12	09:50:00	518.7	169.4
2011-09-12	10:20:00	678.7	218.1
2011-09-12	10:50:00	623.7	191.9
2011-09-12	11:20:00	588.7	180.6
2011-09-12	11:50:00	1481.2	549.4
2011-09-12	12:20:00	1393.7	394.4
2011-09-12	12:50:00	1166.2	291.9
2011-09-12	13:20:00	966.2	284.4
2011-09-12	13:50:00	711.2	224.4
2011-09-12	14:20:00	673.7	226.9
2011-09-12	14:50:00	803.7	234.4
2011-09-12	15:20:00	601.2	176.9
2011-09-12	15:50:00	451.2	134.4
2011-09-12	16:20:00	478.7	156.9
2011-09-12	16:50:00	203.7	51.9
2011-09-12	17:20:00	61.2	15.6
2011-09-12	17:50:00	23.7	6.9
2011-09-12	18:20:00	3.7	0.6
2011-09-12	18:50:00	1.2	0.6
2011-09-12	19:20:00	1.2	0.6
2011-09-12	19:50:00	1.2	0.6
2011-09-12	20:20:00	1.2	0.6
2011-09-12	20:50:00	1.2	0.6
2011-09-12	21:20:00	1.2	0.6
2011-09-12	21:50:00	1.2	0.6
2011-09-12	22:20:00	1.2	0.6
2011-09-12	22:50:00	1.2	0.6
2011-09-12	23:20:00	1.2	0.6
2011-09-12	23:50:00	1.2	0.6
2011-09-13	00:20:00	1.2	0.6
2011-09-13	00:50:00	1.2	0.6
2011-09-13	01:20:00	1.2	0.6
2011-09-13	01:50:00	1.2	0.6
2011-09-13	02:20:00	1.2	0.6
2011-09-13	02:50:00	1.2	0.6
2011-09-13	03:20:00	1.2	0.6
2011-09-13	03:50:00	1.2	0.6
2011-09-13	04:20:00	1.2	0.6
2011-09-13	04:50:00	1.2	0.6
2011-09-13	05:20:00	1.2	0.6
2011-09-13	05:50:00	3.7	0.6
2011-09-13	06:20:00	56.2	19.4
2011-09-13	06:50:00	156.2	54.4
2011-09-13	07:20:00	316.2	103.1
2011-09-13	07:50:00	496.2	151.9
2011-09-13	08:20:00	681.2	194.4
2011-09-13	08:50:00	823.7	211.9
2011-09-13	09:20:00	808.7	235.6
2011-09-13	09:50:00	701.2	233.1
2011-09-13	10:20:00	1076.2	449.4
2011-09-13	10:50:00	1223.7	386.9
2011-09-13	11:20:00	1006.2	289.4
2011-09-13	11:50:00	953.7	259.4
2011-09-13	12:20:00	1018.7	308.1
2011-09-13	12:50:00	948.7	341.9
2011-09-13	13:20:00	1226.2	519.4
2011-09-13	13:50:00	1248.7	544.4
2011-09-13	14:20:00	1383.7	415.6
2011-09-13	14:50:00	1186.2	349.4
2011-09-13	15:20:00	988.7	305.6
2011-09-13	15:50:00	826.2	234.4
2011-09-13	16:20:00	623.7	174.4
2011-09-13	16:50:00	411.2	109.4
2011-09-13	17:20:00	233.7	56.9
2011-09-13	17:50:00	103.7	24.4
2011-09-13	18:20:00	18.7	1.9
2011-09-13	18:50:00	1.2	0.6
2011-09-13	19:20:00	1.2	0.6
2011-09-13	19:50:00	1.2	0.6
2011-09-13	20:20:00	1.2	0.6
2011-09-13	20:50:00	1.2	0.6
2011-09-13	21:20:00	1.2	0.6
2011-09-13	21:50:00	1.2	0.6
2011-09-13	22:20:00	1.2	0.6
2011-09-13	22:50:00	1.2	0.6
2011-09-13	23:20:00	1.2	0.6
2011-09-13	23:50:00	1.2	0.6

## Sheet: Fig. 2-Leaf area index
Year of 2011	OFC-SXJ3	R1	R2	R3		IPNC-SXJ3	R1	R2	R3		OFC-NJ44	R1	R2	R3		IPNC-NJ44	R1	R2	R3
	ETC	1.38336	1.36074	1.4027		ETC	1.36272	1.32975	1.37628		ETC	1.89558	1.88279	2.3874		ETC	1.80244	1.78019	1.83699
	J	3.64688	3.7281	3.63038		J	3.13	3.0487	3.09122		J	3.70075	3.78638	3.71013		J	3.27075	3.23739	3.22592
	H	6.2115	6.31071	6.17406		H	4.96008	4.99483	4.98154		H	6.75489	6.70104	6.68838		H	5.26724	5.48692	5.38206
	MR	3.99039	3.811	3.92206		MR	3.22968	3.41095	3.33748		MR	4.79568	4.62964	4.7779		MR	4.27023	4.18144	4.3248
	MR	3.2274	3.17471	3.01283		MR	2.64779	2.73384	2.75899		MR	3.31846	3.41107	3.55843		MR	3.00242	2.79549	3.04782
Year of 2012	OFC-SXJ3	R1	R2	R3		IPNC-SXJ3	R1	R2	R3		OFC-NJ44	R1	R2	R3		IPNC-NJ44	R1	R2	R3
	ETC	1.47743	1.53413	1.45376		ETC	1.40361	1.52637	1.38805		ETC	2.44769	2.44626	2.36947		ETC	1.96466	2.57063	2.56086
	J	3.7235	3.67906	3.62326		J	3.10986	3.22713	3.15226		J	4.53278	3.89708	3.98011		J	3.59917	3.54043	3.64074
	H	6.07618	6.44516	6.02901		H	4.8582	4.96395	4.99782		H	6.91389	7.044	6.95701		H	5.63083	5.72686	5.7079
	MR	4.00152	4.02147	4.17671		MR	3.36716	3.56845	3.45623		MR	5.33453	5.26382	5.01446		MR	4.37631	4.65579	4.72873
	MR	3.88504	3.75319	3.84933		MR	3.00427	3.23874	3.01246		MR	4.1345	4.21268	4.09195		MR	3.40764	3.41084	3.425

## Sheet: Fig. 3-Dry matter traits
Figure 3a	Dry matter accumulation (kg/hm2)	Year of 2011	R1	R2	R3	Year of 2012	R1	R2	R3	Figur 3b	Leaf area duration (d)	Year of 2011	R1	R2	R3	Year of 2012	R1	R2	R3	Figure 3c	Mean net assimilation rate (g/m2/d)	Year of 2011	R1	R2	R3	Year of 2012	R1	R2	R3
	E-J	OFC-SXJ3	2968.35	3030.3	2814.3	OFC-SXJ3	3350.83	3821.13	3748.88		E-J	OFC-SXJ3	216.228	207.87	191.437	OFC-SXJ3	305.785	251.365	301.5		E-J	OFC-SXJ3	1.37279	1.45778	1.47009	OFC-SXJ3	1.09581	1.52015	1.24341
		IPNC-SXJ3	2366.31	2488.5	2291.4	IPNC-SXJ3	2790.68	3171.61	3189.6			IPNC-SXJ3	186.874	191.682	197.18	IPNC-SXJ3	237.991	274.75	230.642			IPNC-SXJ3	1.26626	1.29824	1.16208	IPNC-SXJ3	1.1726	1.15436	1.38292
		OFC-NJ44	3616.04	3713.4	3580.2	OFC-NJ44	4749.39	4110.06	4304.55			OFC-NJ44	359.243	389.217	420.024	OFC-NJ44	599.338	567.617	553.039			OFC-NJ44	1.00657	0.95407	0.852379	OFC-NJ44	0.79244	0.724091	0.778344
		IPNC-NJ44	2938.71	3010.5	2815.2	IPNC-NJ44	3454.99	3436.99	3419.72			IPNC-NJ44	414.141	332.28	405.678	IPNC-NJ44	517.67	524.383	543.883			IPNC-NJ44	0.709591	0.906014	0.693949	IPNC-NJ44	0.667411	0.655434	0.628761
	J-H	OFC-SXJ3	4815.77	5118.7	5011.7	OFC-SXJ3	4772.25	4919.75	4324.21		J-H	OFC-SXJ3	98.9583	101.481	98.7813	OFC-SXJ3	96.1372	100.963	94.158		J-H	OFC-SXJ3	4.86647	5.044	5.07353	OFC-SXJ3	4.964	4.87282	4.5925
		IPNC-SXJ3	3928.93	3848.5	3835.6	IPNC-SXJ3	3948.88	4151.42	3717.74			IPNC-SXJ3	80.6281	79.7982	79.9179	IPNC-SXJ3	78.3254	79.5426	80.29			IPNC-SXJ3	4.8729	4.82279	4.79943	IPNC-SXJ3	5.04163	5.21911	4.63039
		OFC-NJ44	5875.05	5698	5822.9	OFC-NJ44	6086.96	6726.29	6531.8			OFC-NJ44	143.773	143.381	141.045	OFC-NJ44	178.871	139.726	140.05			OFC-NJ44	4.08634	3.97402	4.12839	OFC-NJ44	3.403	4.81392	4.66391
		IPNC-NJ44	5317.9	5287.89	5315.79	IPNC-NJ44	5626.72	5833.32	5323.3			IPNC-NJ44	114.191	118.65	115.457	IPNC-NJ44	116.613	118.446	119.35			IPNC-NJ44	4.65701	4.4567	4.60412	IPNC-NJ44	4.82513	4.92488	4.46026
	H-M	OFC-SXJ3	5097.25	5213.43	4893.25	OFC-SXJ3	5603.26	5086.37	5478.42		H-M	OFC-SXJ3	179.953	175.886	175.161	OFC-SXJ3	182.39	184.538	184.374		H-M	OFC-SXJ3	2.83255	2.9641	2.79357	OFC-SXJ3	3.07213	2.75627	2.97137
		IPNC-SXJ3	3978.68	4147.4	4119.21	IPNC-SXJ3	4610.62	4245.31	4310.97			IPNC-SXJ3	144.938	150.394	148.759	IPNC-SXJ3	147.569	154.96	150.448			IPNC-SXJ3	2.74509	2.75769	2.76905	IPNC-SXJ3	3.12439	2.73962	2.86542
		OFC-NJ44	6573.83	5874.49	6887.04	OFC-NJ44	6792.29	7408.01	7834.24			OFC-NJ44	267.762	263.887	273.454	OFC-NJ44	276.981	279.772	270.439			OFC-NJ44	2.4551	2.22614	2.51853	OFC-NJ44	2.45226	2.64787	2.89687
		IPNC-NJ44	5317.99	5361.92	5631.81	IPNC-NJ44	6099.73	6079.86	6256.12			IPNC-NJ44	233.255	227.857	237.341	IPNC-NJ44	227.339	235.697	237.457			IPNC-NJ44	2.2799	2.3532	2.37288	IPNC-NJ44	2.6831	2.57952	2.63463
	E-M	OFC-SXJ3	12881.4	13362.4	12719.3	OFC-SXJ3	13726.3	13827.2	13551.5		E-M	OFC-SXJ3	495.138	485.237	465.379	OFC-SXJ3	584.313	536.867	580.032		E-M	OFC-SXJ3	2.60157	2.7538	2.73309	OFC-SXJ3	2.34914	2.57555	2.33634
		IPNC-SXJ3	10273.9	10484.4	10246.2	IPNC-SXJ3	11350.2	11568.3	11218.3			IPNC-SXJ3	412.441	421.875	425.857	IPNC-SXJ3	463.885	509.253	461.38			IPNC-SXJ3	2.49101	2.48519	2.40602	IPNC-SXJ3	2.44677	2.27163	2.43147
		OFC-NJ44	16064.9	15285.9	16290.1	OFC-NJ44	17628.6	18244.4	18670.6			OFC-NJ44	770.778	796.485	834.524	OFC-NJ44	1055.19	987.114	963.528			OFC-NJ44	2.08425	1.91917	1.95203	OFC-NJ44	1.67066	1.84825	1.93773
		IPNC-NJ44	13574.6	13660.3	13762.8	IPNC-NJ44	15181.4	15350.2	14999.1			IPNC-NJ44	761.587	678.787	758.476	IPNC-NJ44	861.621	878.526	900.69			IPNC-NJ44	1.78241	2.01246	1.81453	IPNC-NJ44	1.76196	1.74726	1.6653

## Sheet: Table1-Microclimatic parameters
	Daytime microclimtic parameters (2011)	OFC						IPNC							Nighttime microclimtic parameters (2011)	OFC					IPNC
	Date	Soil-T℃	Air speed (m/s)	Gust speed (m/s)	Air-T℃	RH (%)	Solar radiation (W/m2)	Soil-T℃	Air speed (m/s)	Gust speed (m/s)	Air-T℃	RH (%)	Solar radiation (W/m2)			Soil-T℃	Air speed (m/s)	Gust speed (m/s)	Air-T℃	RH (%)	Soil-T℃	Air speed (m/s)	Gust speed (m/s)	Air-T℃	RH (%)
1	2011-06-22	29.5239	2.2673	4.83849	30.9396	76.2684	412.57	29.7791	0.624971	1.76888	31.1776	77.3909	299.666			28.7555	1.05359	2.57668	26.99	88.7214	29.2389	0.0985243	0.248524	26.9018	90.4096
2	2011-06-23	29.2585	2.10615	4.55129	30.3377	75.9143	367.875	29.6567	0.65268	1.74441	30.6594	77.0611	287.51			28.8199	0.679051	1.76385	26.8694	90.8252	29.253	0.0873041	0.237304	26.7554	92.2226
3	2011-06-24	28.7674	1.26489	2.90282	28.5101	84.4683	231.76	29.061	0.376518	1.31902	28.9949	85.289	188.958			28.4692	0.56025	1.68915	26.6775	92.9316	28.7475	0.0857243	0.235724	26.5342	94.7756
4	2011-06-25	28.2655	1.2615	2.91919	28.8365	87.3999	229.97	28.3547	0.219906	0.988538	29.2554	87.8407	172.3			28.071	0.70624	2.03526	26.4699	93.5163	28.3024	0.086204	0.236204	26.2883	95.1405
5	2011-06-26	28.7607	1.5019	3.63813	30.8957	78.3903	341.129	28.9057	0.20793	0.894512	31.1525	79.5605	253.357			28.4367	0.579167	1.8324	27.1163	92.9954	28.7208	0.0865824	0.236582	26.7957	95.3835
6	2011-06-27	29.2663	1.99456	4.60501	30.0616	80.2524	330.802	29.4188	0.373939	1.02746	30.2458	81.2093	237.177			28.8574	0.840059	2.27213	26.8318	91.7668	29.1148	0.0884957	0.238496	26.6909	94.13
7	2011-06-28	27.9321	1.16806	2.55149	27.2356	86.7393	216.941	28.1547	0.18095	0.815282	27.8846	87.1806	178.081			28.0669	0.490757	1.43029	25.4818	93.9875	28.2925	0.0898233	0.239823	25.357	95.5267
8	2011-06-29	28.0658	1.27145	3.07877	28.7461	81.7478	244.648	28.4313	0.206345	1.07799	29.4046	81.4348	223.891			28.9318	1.22981	2.72184	26.5959	89.86	29.1036	0.171252	0.321252	26.6746	90.43
9	2011-06-30	27.3331	1.68295	3.59296	27.0708	88.2107	176.961	27.8003	0.438317	1.29142	27.2693	88.8621	121.966			27.4453	0.495696	1.37865	25.737	93.855	27.7882	0.167537	0.317537	25.6992	95.8579
10	2011-07-01	27.7422	2.06957	4.37262	29.1717	80.8893	262.854	28.2637	0.615961	1.73297	29.4685	81.2926	186.548			27.7619	0.756116	1.91049	26.7778	90.605	28.1754	0.14867	0.29867	26.5646	93.0381
11	2011-07-02	29.8653	2.73617	5.68434	32.2122	68.5714	521.389	30.6217	0.93857	2.28974	32.4908	69.7929	377.957			29.064	1.09938	2.46119	28.3821	81.87	29.6574	0.109189	0.259189	28.1797	84.18
12	2011-07-03	30.0466	2.94336	5.96304	32.5217	64.4786	454.55	31.0225	0.985074	2.31636	32.7984	65.7	366.743			29.684	0.923593	2.07865	28.5488	82.955	29.32	0.086671	0.236671	28.3369	85.15
13	2011-07-04	29.7603	1.68359	3.6539	29.517	81.625	211.829	30.4606	0.319123	1.22943	30.021	82.4741	169.063			29.1581	0.736809	2.01354	27.8618	88.695	29.6165	0.0910476	0.241048	27.7979	90.6286
14	2011-07-05	28.054	1.2046	2.68358	27.6634	92.3036	138.618	28.4691	0.140853	0.76646	27.9228	92.9444	106.144			28.0282	0.764422	1.95809	26.0427	95.885	28.4431	0.0890752	0.239075	26.0649	96.6857
15	2011-07-06	29.129	1.45043	3.32821	32.0507	77.1214	293.75	29.5404	0.254968	1.02629	32.3221	78.6321	218.532			28.9121	0.393324	1.29514	28.0775	93.005	29.2101	0.08395	0.23395	27.7632	95.805
16	2011-07-07	30.0412	2.02406	4.35081	30.9549	77.8586	303.866	30.479	0.587549	1.62426	31.3197	78.0571	260.986			29.9669	0.588639	1.63863	28.1436	87.07	30.0723	0.0832205	0.23322	27.9623	89.76
17	2011-07-08	27.8723	1.13055	2.48018	25.5108	86.0966	148.117	28.1871	0.155546	0.799541	26.0892	86.1464	103.13			28.4481	0.653519	1.81598	25.2544	90.135	28.5834	0.087977	0.237977	25.2899	91.52
18	2011-07-09	29.1084	1.14543	2.86237	29.1391	72.0321	427.954	29.0537	0.241819	1.02532	29.8096	71.7893	322.768			28.1866	0.300381	1.10072	25.1685	93.135	28.1968	0.0874675	0.237468	25.0577	93.99
19	2011-07-10	29.9204	1.86399	4.30671	29.9858	80.5929	374.864	29.8321	0.420938	1.51072	30.4469	79.8464	286.521			29.1349	1.12968	2.81276	27.2916	89.75	29.2831	0.0851465	0.235146	27.246	90.535
20	2011-07-11	28.648	1.90592	4.25186	28.1776	86.1407	182.567	29.0842	0.44641	1.5114	28.549	85.7154	155.573			28.2422	1.66643	4.03779	24.9584	92.0714	28.5027	0.0876	0.2376	24.9764	93.0091
21	2011-07-12	26.5357	1.10486	2.46293	26.1744	96.1571	110.889	27.0908	0.100384	0.580653	26.2868	97.4321	82.8607			26.9459	0.933471	2.37656	24.6745	98.935	27.2574	0.101196	0.251196	24.6771	99.555
22	2011-07-13	26.4201	0.642901	1.89079	25.1868	97.9741	72.6185	26.6927	0.0500552	0.505208	25.3173	98.6148	54.7926			26.6417	0.305106	1.17103	24.5693	99.7476	26.8494	0.10042	0.25042	24.6177	99.9429
23	2011-07-14	25.4366	1.11768	3.07133	22.8396	93.6111	117.337	25.7325	0.470951	1.47721	22.9556	93.8667	91			25.7989	0.597598	2.08528	23.2043	98.0714	25.9926	0.0942995	0.2443	23.2627	98.7
24	2011-07-15	24.7622	0.98072	2.53754	23.3729	95.6154	78.7	25.0082	0.195066	0.93076	23.4731	96.1593	59.9778			24.8611	0.551862	1.67681	22.9087	96.9455	25.0646	0.0814681	0.231468	22.8396	97.7714
25	2011-07-16	25.1833	1.01731	2.56235	25.0623	94.2714	160.8	25.4394	0.374333	1.18686	25.2964	94.0815	125.352			25.3495	0.625232	1.9655	23.7715	97.685	25.4428	0.07704	0.22704	23.6977	98.1905
26	2011-07-17	26.1856	0.746142	2.08288	26.0011	96.9357	118.929	26.2102	0.126219	0.657702	26.2511	96.8778	98.0333			26.0064	0.644988	2.04003	24.783	99.505	26.0286	0.0784933	0.228493	24.6835	99.8143
27	2011-07-18	27.0675	1.47804	3.43069	27.7572	91.7259	204.463	27.088	0.311868	1.20388	28.2496	90.75	172.142			26.6496	1.18151	3.07095	25.5928	98.7524	26.8161	0.0882513	0.238251	25.5474	99.825
28	2011-07-19	26.2702	0.931426	2.29921	25.5466	98.163	73.2667	26.4684	0.00689536	0.461668	25.6781	99.1607	54.2036			26.4114	0.553125	1.56166	24.8554	98.7714	26.5011	0.085582	0.235582	24.8121	99.66
29	2011-07-20	26.6597	1.66387	3.5726	26.4587	87.45	280.086	27.0281	0.33991	1.14661	27.0656	87.6556	209.563			26.4872	0.31879	1.07131	23.6753	98.855	26.4494	0.0776962	0.227696	23.6544	99.681
30	2011-07-21	27.6616	0.566221	1.90312	29.7998	77.5714	391.114	27.8519	0.0758489	0.612404	30.3585	78.4964	288.46			27.7445	0.0482675	0.541719	23.6101	98.77	27.6012	0.086416	0.236416	23.6415	99.17
31	2011-07-22	29.0317	0.970481	2.38259	31.5935	76.1464	412.143	28.958	0.163083	0.778374	32.409	76.6393	327.682			29.2297	0.112923	0.512533	25.9021	96.055	29.0254	0.090446	0.240446	25.8246	97.01
32	2011-07-23	30.0802	1.03158	2.76295	31.6705	79.3036	352.057	30.1062	0.195475	0.917083	32.3321	80.2071	309.511			29.7785	0.562148	1.69498	27.6637	93.73	29.4747	0.083512	0.233512	27.376	95.945
33	2011-07-24	29.9614	0.984914	2.4161	32.9543	75.2536	439.243	30.4412	0.13005	0.77212	33.7572	76.5321	337.457			30.329	0.727829	1.76143	27.7945	91.75	29.9566	0.080679	0.230679	27.649	93.175
34	2011-07-25	30.8727	1.59122	3.5208	33.4918	71.3071	455.414	31.0314	0.454131	1.33898	33.8178	74.1143	356.757			30.6315	0.570903	1.67746	27.9457	91.975	30.4757	0.0822045	0.232204	27.7434	94.08
35	2011-07-26	29.5437	2.00154	4.47936	28.8925	81.4148	330.341	29.7706	0.614797	1.89079	29.278	82.0222	257.067			29.2849	0.728235	2.06711	27.197	89.5619	29.582	0.085169	0.235169	26.8568	93.0714
36	2011-07-27	29.9239	1.33289	3.22125	31.7937	77.6179	355.943	30.1287	0.325941	1.13198	32.3335	79.5778	295.811			29.0682	0.449225	1.5843	27.7027	89.27	29.4061	0.0839219	0.233922	27.3031	92.3524
37	2011-07-28	30.7062	1.49806	3.43405	31.7452	77.9107	404.107	30.5227	0.340076	1.1812	32.548	78.4704	312.759			30.4027	0.161191	0.764647	26.9105	93.91	30.0193	0.0828838	0.232884	26.6068	96.0048
38	2011-07-29	31.9819	1.06429	2.42957	33.554	69.6429	474.146	30.9723	0.208785	0.78575	34.2289	71.9786	364.604			31.6851	0.393773	1.3699	28.7938	90.565	30.5419	0.0838385	0.233839	28.1423	93.66
39	2011-07-30	31.8432	1.4506	3.29998	32.597	74.3556	419.659	30.6852	0.117221	0.22434	32.9408	77.8893	322.814			30.2445	0.542862	1.6504	27.8164	88.1429	30.4487	0.083837	0.233837	27.4283	92.525
40	2011-07-31	30.0948	0.912593	2.46966	30.0867	82.5107	269.636	29.5806	0.0786581	0.171618	30.6271	83.2074	204.756			29.6619	0.738605	2.10648	26.9959	91.01	29.6029	0.0820536	0.232054	26.6687	93.9545
41	2011-08-01	29.6637	1.01041	2.74243	29.6212	81.8214	344.2	29.0743	0.398675	1.25739	30.494	81.4769	297.119			29.0928	0.913822	2.59116	26.5185	88.8762	29.2095	0.0808641	0.230864	26.3216	91.3136
42	2011-08-02	29.1825	1.79842	3.99265	29.667	83.9654	303.75	28.9365	0.311372	1.24802	29.8643	84.9889	221.374			28.4469	1.0078	2.69216	25.598	95.5727	28.8203	0.08786	0.23786	25.624	96.6391
43	2011-08-03	28.4704	1.26894	3.13955	28.1538	87.35	281.2	28.291	0.320287	1.17245	28.5204	88.4222	208.278			27.9558	0.43451	1.44905	25.19	98.6955	28.1825	0.0879371	0.237937	25.174	99.2952
44	2011-08-04	27.7744	0.846192	2.15175	27.5032	87.3115	251.692	27.6614	0.433914	1.4086	27.9688	88.1038	208.854			27.7804	0.383691	1.36476	25.4932	97.1682	27.8785	0.0804009	0.230401	25.2706	98.9227
45	2011-08-05	28.4771	1.3184	3.15481	30.0096	82.4963	321.322	28.2402	0.298959	1.21062	30.588	82.737	238.456			28.1138	0.648057	2.11244	26.8971	91.1476	28.1617	0.0833329	0.233333	26.5117	93.5952
46	2011-08-06	28.3924	1.55337	3.94804	29.7408	79.6593	388.507	28.271	0.160892	0.762739	29.9829	80.4889	288.181			27.9613	0.76501	2.36965	26.1552	92.9857	28.2314	0.0892148	0.239215	25.8281	94.9619
47	2011-08-07	28.4914	1.96507	4.85922	29.1683	82.6462	357.738	28.3586	0.16033	0.430666	29.1719	84.3615	213.369			27.7479	1.09148	2.90564	25.5199	96.4636	27.66	0.0937709	0.243771	25.4194	98.5
48	2011-08-08	27.9918	1.20556	2.6228	28.9603	87.3821	285.764	28.1223	0.206353	0.831024	29.6799	88.2148	223.037			27.6857	0.327994	1.0446	25.7093	97.84	28.0016	0.0916695	0.24167	25.424	99.5333
49	2011-08-09	28.8	1.06363	2.76085	30.0908	83.5889	397.237	28.7784	0.19307	0.44553	31.0301	84.4346	319.285			28.4497	0.4103	1.3579	26.2353	95.7048	28.6556	0.0907014	0.240701	25.9834	99.2909
50	2011-08-10	28.5152	0.994784	2.65708	28.2955	91.1074	178.348	28.5346	0.19307	0.538426	28.7205	92.3	172.212			27.7927	0.295912	1.12827	25.616	99.0381	28.1479	0.0916268	0.241627	25.5576	99.9773
51	2011-08-11	28.4745	1.60725	3.51239	30.2668	83.1577	410.185	28.4452	0.110326	0.270041	30.9812	85.163	312.337			27.9688	0.602885	1.69314	26.134	97.0045	28.247	0.0872771	0.237277	25.8898	98.9381
52	2011-08-12	28.5292	2.02896	4.49518	29.4482	85.0923	410.723	28.6774	0.329641	1.1949	30.1357	86.0385	295.088			28.1636	0.569005	1.58415	25.8744	97.1591	28.5928	0.0818882	0.231888	25.6505	99.25
53	2011-08-13	28.5963	1.67743	3.90647	29.0078	86.437	382.711	28.8173	0.205759	0.931968	29.7809	87.6808	296.923			27.7604	0.72011	1.98736	24.9675	98.7619	27.44	0.0890495	0.23905	24.8209	99.95
54	2011-08-14	28.3236	1.54974	3.79854	30.253	82.9731	420.388	28.5015	0.398675	1.25739	31.1157	85	328.746			28.0099	0.864937	2.45603	25.476	96.7591	28.5105	0.0878645	0.237865	25.1412	98.9136
55	2011-08-15	28.6961	1.70637	4.02114	32.0154	75.9846	424.715	28.8679	0.311372	1.24802	32.3036	80.1692	326.438			28.3641	0.288993	1.09291	27.6473	92.0455	28.9765	0.0772668	0.227267	27.1722	95.3409
56	2011-08-16	28.846	1.92034	4.45805	32.0956	75.7115	373.565	29.4071	0.320287	1.17245	32.1571	79.9808	286.062			28.6547	0.459205	1.51538	28.5217	88.4818	28.47	0.0776618	0.227662	28.038	93.2182
57	2011-08-17	28.7777	1.01904	2.67978	30.9193	82.8083	240.837	29.0663	0.433914	1.4086	31.3125	86.5826	189.322			28.9806	0.552644	1.86447	27.7827	91.975	29.3002	0.0775416	0.227542	27.551	95.04
58	2011-08-18	29.1144	0.84671	2.53132	29.9626	83.8923	271.685	29.0034	0.298959	1.21062	30.2873	86.4231	199.619			28.761	0.68697	2.10969	27.2903	95.7864	28.5837	0.0772968	0.227297	27.0249	97.5136
59	2011-08-19	26.9606	0.824951	2.24379	26.8414	91.0885	165.585	27.1425	0.160892	0.762739	27.1507	92.8077	120.046			27.6052	1.00086	2.96524	24.6357	97.7273	27.7495	0.0858477	0.235848	24.6816	98.7818
60	2011-08-20	27.5639	0.93202	2.48798	29.1533	84.8423	345.923	27.5148	0.16033	0.430666	29.6133	86.2846	253.512			27.3171	0.645335	1.99927	24.943	94.1682	27.6332	0.0775295	0.22753	24.7189	97.1773
61	2011-08-21	26.753	0.973812	2.60144	26.5609	87.3962	208.319	26.9711	0.206353	0.831024	27.0184	88.6538	171.538			26.8169	0.762892	2.22786	24.6796	94.9864	27.2483	0.0761777	0.226178	24.5224	97.0773
62	2011-08-22	25.6411	1.11065	3.10151	23.4135	96.296	83.128	26.0654	0.19307	0.44553	23.5269	97.472	72.228			25.5393	0.569449	1.88072	23.3307	98.5478	26.0373	0.0733343	0.223334	23.2379	99.5957
63	2011-08-23	24.5756	1.11748	3.20243	23.6563	89.7706	98.1235	24.5971	0.19307	0.538426	22.6952	97.3889	67.9889			24.4557	0.915552	2.75319	22.3087	94.9455	24.8777	0.0720164	0.222016	21.8129	99.9364
64	2011-08-24	22.5014	1.23904	3.31362	19.6033	99.4609	60.0826	24.6633	0.110326	0.270041	25.259	71.1714	80.4429			23.134	1.22236	3.28776	19.8193	97.276	24.1882	0.03524	0.18524	21.0365	94.8545
65	2011-08-25	22.3963	1.10185	3.15306	21.1949	100	48.576	23.656	0.329641	1.1949	23.9308	89.0417	80.4429			22.6702	1.26286	3.44403	21.0776	99.9826	23.8205	0.0361671	0.186167	22.5626	92.1917
66	2011-08-26	24.0825	1.48403	3.51818	23.5464	88.54	262.472	23.6658	0.205759	0.931968	23.3863	93.5261	91.3583			23.8931	0.995609	2.81152	23.8029	98.013	23.682	0.0346567	0.184657	21.5606	99.0667
67	2011-08-27	22.561	1.26877	3.14041	21.4155	89.1231	326.677	22.9309	0.398675	1.25739	21.4713	98.0625	75.413			22.3399	0.610844	1.93274	24.5981	97.8364	22.9882	0.0495746	0.199575	20.8898	99.1208
68	2011-08-28	22.2696	1.41245	3.20413	22.0196	91.3808	225.142	22.6423	0.311372	1.24802	22.6174	92.5913	40.7333			22.9476	0.865345	2.07622	25.3912	97.2	22.6157	0.0563525	0.206353	20.7707	98.5375
69	2011-08-29	23.0555	1.30521	2.99638	23.3058	90.4962	194.035	23.1344	0.320287	1.17245	24.8597	88.1583	74.9304			23.9366	1.05964	2.61053	25.338	99.0545	23.2515	0.0467296	0.19673	21.8022	96.0458
70	2011-08-30	24.5982	1.4703	3.77799	25.4838	98.1192	88.3615	24.3803	0.433914	1.4086	27.6903	85.048	159.696			24.5045	1.17801	3.19341	24.4736	99.35	24.3485	0.0381971	0.188197	23.0519	96.3958
71	2011-08-31	25.0786	1.77131	4.32888	28.2562	81.7885	391.777	25.2252	0.298959	1.21062	28.9073	84.9833	238.988			25.7213	1.01678	2.98156	25.0582	95.85	25.2871	0.0327175	0.182717	24.0651	97.4083
72	2011-09-01	26.3159	0.961378	3.23867	28.3511	80.9538	415.335	26.0178	0.160892	0.762739	31.4753	77.0417	237.758			26.0163	0.543086	2.0007	24.5142	94.4364	26.0281	0.0879204	0.23792	24.7406	95.3958
73	2011-09-02	26.0271	0.195488	2.02983	28.0615	76.0038	413.654	26.6563	0.16033	0.430666	32.2321	75.5667	331.783			25.9166	0.153068	1.0776	23.5783	95.9182	26.6017	0.154015	0.304015	24.9022	96.8792
74	2011-09-03	25.727	0.0948081	1.64852	27.1644	70.2577	438.319	26.123	0.206353	0.831024	28.1218	91.3542	317.188			25.7039	0.127761	0.703501	21.9028	93.4409	26.2744	0.16842	0.31842	23.9465	99.9458
75	2011-09-04	25.1452	0.117085	1.99235	26.9403	70.55	410.088	26.056	0.19307	0.44553	28.178	89.05	176.246			24.8554	0	0	20.7388	94.1591	26.0357	0.149926	0.299926	23.5679	97.0346
76	2011-09-05	23.5991	0.288108	1.9191	21.006	70.1667	312.029	23.5266	0.19307	0.538426	21.256	75.3583	181.755			23.9805	0.0175518	0.382262	20.7403	93.0682	23.6774	0.0919137	0.241914	18.0309	88.6458
77	2011-09-06	23.5946	0.20205	1.27498	24.9747	68.572	270.372	24.6633	0.110326	0.270041	25.259	71.1714	80.4429			23.48	0	0.00839435	20.7353	91.2478	24.1882	0.03524	0.18524	21.0365	94.8545
78	2011-09-07	23.1538	0.932842	3.26639	23.819	85.084	130.832	23.656	0.329641	1.1949	23.9308	89.0417	80.4429			23.3034	0.445681	1.61347	22.9701	87.2304	23.8205	0.0361671	0.186167	22.5626	92.1917
79	2011-09-08	23.3774	0.478993	2.24446	23.2162	92.232	93.98	23.6658	0.205759	0.931968	23.3863	93.5261	91.3583			23.2404	0.139971	0.987605	21.6326	97.7478	23.682	0.0346567	0.184657	21.5606	99.0667
80	2011-09-09	22.6444	0.495852	2.36564	21.5133	96.9565	64.5957	22.9309	0.398675	1.25739	21.4713	98.0625	75.413			22.6826	0.174212	1.64083	21.0832	96.76	22.9882	0.0495746	0.199575	20.8898	99.1208
81	2011-09-10	22.3897	0.49072	2.67978	22.4766	90.9208	95.3083	22.6423	0.311372	1.24802	22.6174	92.5913	40.7333			22.3544	0.311307	1.77112	20.9763	96.525	22.6157	0.0563525	0.206353	20.7707	98.5375
82	2011-09-11	22.9552	0.686252	2.87809	24.3455	87.044	209.568	23.1344	0.320287	1.17245	24.8597	88.1583	74.9304			22.9535	0.429869	1.63826	22.1524	93.9043	23.2515	0.0467296	0.19673	21.8022	96.0458
83	2011-09-12	23.9869	1.78935	4.12936	26.8964	83.98	330.424	24.3803	0.433914	1.4086	27.6903	85.048	159.696			23.9102	1.27145	3.18517	23.6584	92.9826	24.3485	0.0381971	0.188197	23.0519	96.3958
84	2011-09-13	24.9575	0.768868	3.09361	28.0268	84.408	322.168	25.2252	0.298959	1.21062	28.9073	84.9833	238.988			24.873	0.745926	2.43983	24.6508	94.5652	25.2871	0.0327175	0.182717	24.0651	97.4083
85	2011-09-14	25.8072	0.433914	2.78093	30.5933	74.712	435.416	26.0178	0.160892	0.762739	31.4753	77.0417	237.758			25.6005	0.704735	2.45564	25.4634	91.7348	26.0281	0.0879204	0.23792	24.7406	95.3958
86	2011-09-15	26.5626	0.262575	2.0575	31.3099	72.36	445.328	26.6563	0.16033	0.430666	32.2321	75.5667	331.783			26.1642	0.648317	1.95374	25.5035	93.5826	26.6017	0.154015	0.304015	24.9022	96.8792
87	2011-09-16	25.9977	0.25611	1.90861	27.5784	89.9	223.076	26.123	0.206353	0.831024	28.1218	91.3542	317.188			25.9172	0.114983	0.793363	24.2092	99.187	26.2744	0.16842	0.31842	23.9465	99.9458
88	2011-09-17	25.9748	0.253392	1.85417	27.5979	88.0913	239.204	26.056	0.19307	0.44553	28.178	89.05	176.246			25.6602	1.00738	3.49645	23.6517	96.064	26.0357	0.149926	0.299926	23.5679	97.0346
89	2011-09-18	22.7625	1.46842	4.93956	21.2939	71.6833	263.804	23.5266	0.19307	0.538426	21.256	75.3583	181.755			22.764	0.473882	2.9112	18.2839	84.7792	23.6774	0.0919137	0.241914	18.0309	88.6458
90	2011-09-19	19.8009	1.5284	4.76335	16.7753	75.292	233.876	20.581	0.454613	1.23737	17.0617	77.2667	199.846			19.6362	0.229576	1.90474	14.602	90.2913	20.5644	0.0401942	0.190194	14.4512	93.9792
91	2011-09-20	18.5081	0.899497	2.81149	16.7894	79.6	99.6375	19.1335	0.271743	0.965545	17.1087	82.5	183.179			18.6437	0.55227	2.13612	15.5952	86.7333	19.2967	0.0310233	0.181023	15.2202	91.8958
92	2011-09-21	19.3989	1.1049	3.39211	21.1268	58.892	423.276	19.6808	0.444136	1.5309	21.6363	61.3875	69.7			18.6556	0.0380752	0.678349	13.7436	91.712	19.4158	0.0232137	0.173214	13.6009	96.025
93	2011-09-22	19.1436	0.475192	2.18139	22.0577	56.3	369.942	19.2496	0.118424	0.529072	22.336	61.2875	296.412			18.51	0	0.0316171	13.3602	97.975	19.1811	0.0111713	0.161171	13.3515	98.9792
94	2011-09-23	19.1915	0.298675	1.46141	22.662	58.484	375.176	19.2952	0.0482675	0.342175	23.4592	62.3875	245.521			19.0161	0	0.138019	13.4721	98.2957	19.3487	0.00523833	0.155238	13.4079	98.9708
95	2011-09-24	19.3524	0.866211	2.43107	22.3525	59.532	399.612	19.4867	0.223003	0.493339	23.5927	61.6417	275.208			19.2516	0.234651	0.964569	14.9594	93.9652	19.5944	0.00578083	0.155781	14.4074	96.375
96	2011-09-25	19.8195	1.24298	3.43223	22.7331	73.2708	240.625	19.9862	0.282496	1.08714	23.356	75.825	275.321			19.7778	0.188206	1.44447	18.6944	88.1292	20.2145	0.0078125	0.157812	18.0116	92.6375
97	2011-09-26	21.008	0.850562	2.94173	24.2675	80.9957	298.339	21.1779	0.168375	0.825037	24.8357	81.7958	173.492			20.9862	0.7096	2.43735	20.8655	91.272	21.354	0.008325	0.158325	20.2811	94.5958
98	2011-09-27	21.8476	1.79873	4.76487	24.0036	84.6087	152.635	22.1461	0.470864	1.6205	24.2028	86.0435	197.708			21.8301	1.09502	3.11642	22.158	92.068	22.2749	0.0076	0.1576	21.8671	94.2958
99	2011-09-28	22.9512	2.0654	4.82974	26.7421	83.75	331.462	23.1028	0.622613	1.59114	27.1097	84.5667	104.274			22.7584	0.98911	2.70261	23.2003	94.1625	23.1992	0.00632958	0.15633	22.8746	96.1792
100	2011-09-29	22.3664	1.06179	3.68629	21.3603	91.6	67.0391	22.8609	0.478868	1.61171	21.4652	92.7348	59.69			22.1089	0.588549	1.85653	20.7228	98.92	21.7412	0.0805946	0.230595	20.6891	99.5042
101	2011-09-30	20.3543	0.600489	2.10659	18.5804	95.0348	81.6043	21.0329	0.135074	0.675558	18.6775	97.7167	47.2			20.4285	0.931046	2.72094	18.2075	95.704	20	0.171565	0.321565	17.9314	98.2833
102	2011-10-01	19.4934	1.6043	4.10757	18.8708	87.0913	130.078	20.1131	0.480235	1.51411	18.9682	89.987	59.1708			19.4365	0.96966	3.02015	17.4416	92.384	19.07	0.166301	0.316301	17.1226	95.875
103	2011-10-02	18.7138	0.738898	2.95149	17.0785	91.2609	86.2739	19.3516	0.166716	1.04519	17.0444	94.5391	94.6522			18.5527	0.26958	1.82689	16.0474	94.052	18.33	0.165786	0.315786	15.775	97.0542
104	2011-10-03	17.9506	1.06179	3.45105	17.4482	76.1783	191.439	18.5266	0.39102	1.62206	17.4025	80.0696	64.3783			17.8156	0.112609	0.782517	14.3657	95.26	17.56	0.161429	0.311429	14.2341	98.5375
105	2011-10-04	17.6413	0.8123	2.83651	19.3437	65.5435	353.77	18.054	0.206345	1.17599	20.0307	68.1	138.887			17.4767	0.0077228	0.424574	13.9038	92.98	17.22	0.104563	0.254563	13.5732	97.2292
106	2011-10-05	18.2236	0.236603	1.78331	20.604	67.4652	313.07	18.4883	0.0321783	0.0321783	21.262	70.2583	233.939			17.8347	0	0.0892612	14.1971	95.784	17.45	0.0448825	0.194882	13.8602	98.8792
107	2011-10-06	18.0714	0.405467	1.79034	21.3626	72.0478	312.204	18.3219	0	0.00839435	21.7001	74.0043	219.225			17.9325	0	0	13.6443	98.588	17.57	0.0292848	0.179285	13.6461	98.904
108	2011-10-07	17.9917	1.03778	2.46364	21.8527	69.7348	344.917	18.2257	0	0.456223	22.5959	71.5783	196.009			17.8534	0.0149068	0.15697	12.8683	97.928	17.95	0.0190876	0.169088	12.7908	98.456
109	2011-10-08	18.9776	2.35061	5.13754	22.6788	71.2826	366.822	19.0618	0.200879	0.34534	23.4012	71.8783	231.335			18.1733	0.813588	2.42262	16.8576	85.504	17.95	0.0116788	0.161679	15.8397	90.472
110	2011-10-09	19.3367	1.7593	3.89771	23.1604	72.2043	373.73	20.0555	0.13431	0.232309	23.9764	72.6087	253.509			18.9584	1.39423	3.3842	18.1607	89.6	18.9	0.0079004	0.1579	17.6532	92.612
111	2011-10-10	20.6247	1.91235	4.3674	24.2869	82.1957	292.583	21.4905	0.150513	0.717229	24.9351	82.0696	250.087			20.2511	1.10328	3.10151	20.0007	93.012	20.4	0.0047356	0.154736	19.6381	94.512
112	2011-10-11	20.7772	1.58887	3.84949	22.3556	81.5913	202.191	22.0304	0.140415	0.218173	22.8664	81.5955	157.53			20.3876	1.46859	3.84577	19.8012	85.708	20.66	0.00161769	0.151618	19.5959	88
113	2011-10-12	19.9095	2.34866	5.10454	20.8129	81.9913	215.896	21.191	0.184676	0.19307	21.2248	82.4696	128.405			19.6059	1.29043	3.44455	17.6349	94.188	19.95	0.0021204	0.15212	17.5682	95.792
114	2011-10-13	18.6968	0.494798	1.91117	16.9461	98.985	41.815	19.4958	0.0868815	0.91596	17.0651	99.1	32.75			18.8656	0.160642	1.35282	16.7098	98.437	19.8134	0.0027296	0.15273	16.716	99.492
115	2011-10-14	19.2681	1.42762	3.41006	21.0023	74.1304	323.13	20.3763	0.096535	0.225112	22.0697	73.0273	124.652			19.1237	0.22468	0.865852	14.4431	98.716	19.7293	0	0.149301	14.5731	99.124
116	2011-10-15	17.7511	2.6411	5.79347	19.6049	54.3826	313.287	18.8691	0.175518	0.209397	20.1754	54.6182	220.864			17.6966	0.179959	0.850047	12.9564	91.388	18.5946	0	0.140036	12.8388	93.008
117	2011-10-16	16.7198	1.73392	3.82392	20.5439	59.6652	345.787	17.8798	0.167887	0.409176	21.2494	60.4739	204.209			16.7186	0.0301728	0.238868	11.5031	96.708	16.98	0	0.1378	11.4012	97.272
118	2011-10-17	16.6778	0.551684	1.71752	20.9527	59.6565	324.374	18.0444	0.159493	0.200879	21.5219	61.7522	192.043			16.7271	0.231684	0.96984	12.4675	94.948	16.2	0	0.13684	12.3291	96.392
119	2011-10-18	17.3101	1.80713	4.07477	20.6887	62.6348	371.161	18.7483	0.167887	0.448219	21.4258	63.3	207.422			17.1016	0.701518	2.2071	14.865	87.068	17.62	0	0.134777	14.1708	90.384
120	2011-10-19	16.4795	2.0982	4.83807	17.6314	67.7609	369.161	18.0384	0.157966	0.349812	18.9432	66.7136	228.678			16.4218	0.441636	1.79582	12.3534	90.012	16.09	0	0.130971	12.0061	93.064
121	2011-10-20	17.2315	1.71713	3.84715	19.7991	82.5261	157.691	18.3058	0.157966	0.317565	20.2928	81.8318	132.05			16.8995	0.648536	1.8057	15.9415	93.68	16.28	0	0.132006	15.7108	95.4808
122	2011-10-21	19.84	0.719625	2.10908	21.5153	75.4955	306.195	19.9019	0.096535	0.12225	22.1822	74.5045	114.95			18.1361	0.052982	0.55227	15.7769	97.372	18.35	0	0.141252	15.5977	98.5462
123	2011-10-22	18.8006	1.2492	2.89293	19.8369	73.4957	306.604	18.9013	0.117521	0.277404	20.6595	72.7174	200.791			17.7648	0.335493	1.09556	14.9111	91.7	18.12	0	0.13661	14.6644	93.328
124	2011-10-23	19.2468	1.82151	3.86977	20.9525	79.3727	196.027	19.6783	0.174682	0.331191	21.6143	78.3952	155.55			18.5484	1.0978	2.92558	17.9824	91.0615	18.63	0	0.140258	17.7946	92.6926
	Daytime microclimtic parameters (2012)	OFC						IPNC							Nighttime microclimtic parameters (2012)	OFC					IPNC
		Soil-T℃	Air speed (m/s)	Gust speed (m/s)	Air-T℃	RH (%)	Solar radiation (W/m2)	Soil-T℃	Air speed (m/s)	Gust speed (m/s)	Air-T℃	RH (%)	Solar radiation (W/m2)			Soil-T℃	Air speed (m/s)	Gust speed (m/s)	Air-T℃	RH (%)	Soil-T℃	Air speed (m/s)	Gust speed (m/s)	Air-T℃	RH (%)
1	2012-06-19	26.9168	2.15296	4.61476	26.6085	75.329	202.294	27.431	0.067716	0.993235	26.9544	75.812	150.431			25.8301	1.2089	3.05514	24.1647	85.693	26.5739	0	0.0531098	24.1536	87.0739
2	2012-06-20	25.6397	1.46282	3.29215	25.7472	80.6455	232.04	26.0817	0.0111752	0.456154	26.2011	80.6688	133.424			25.402	0.65591	1.97842	23.2137	89.8096	25.8644	0	0.0393072	23.2043	91.2762
3	2012-06-21	29.7048	2.56978	5.27874	28.8142	62.3111	190.633	30.1543	0.169622	1.6184	29.1927	62.3778	176.6			27.0677	1.78153	3.7701	25.788	78.3	27.8656	0	0.0414078	25.7372	79.7111
4	2012-06-22	26.1182	2.31436	4.87707	27.1397	73.8586	270.666	26.7421	0.0266303	0.636496	27.4091	74.8724	143.086			25.6544	1.50155	3.73733	23.6923	85.5474	26.513	0	0.0491537	23.6834	86.8632
5	2012-06-23	24.9273	1.57475	3.68846	23.8716	89.8172	145.583	25.3967	0.00689536	0.724814	24.2614	90.1857	81.6071			24.7683	0.343603	1.65799	23.0136	93.2316	25.3431	0	0.0687679	23.0401	94.6474
6	2012-06-24	25.8734	0.499352	1.31092	26.2303	78.2607	279.871	26.1063	0	0.00715074	26.9327	76.9481	175.578			25.7833	0.122577	0.539923	22.935	90.65	25.737	0	0	22.8895	92.3182
7	2012-06-25	26.9138	1.04425	2.71645	28.3956	76.7929	331.339	27.13	0	0.119947	28.9358	76.3321	165.232			26.9243	0.521738	1.3241	23.8337	91.8	26.8832	0	0.195989	23.6985	93.34
8	2012-06-26	25.9398	2.15453	5.31483	24.2289	94.9778	85.5778	26.2614	0.0944627	1.21213	24.4681	95.6308	42.4654			25.9855	1.82871	4.428	24.311	93.6048	26.2165	0	0.212255	24.3429	94.45
9	2012-06-27	24.1584	0.595673	4.70036	23.0921	99.5704	84.5593	24.481	0.0352548	0.986303	23.1393	99.7741	49.3741			24.4602	0.92323	2.97388	23.1025	98.8476	24.7836	0	0.35642	23.1024	99.6048
10	2012-06-28	25.4805	1.60908	4.03801	26.2211	95.3	155.304	25.7678	0	0.145177	26.4418	95.4593	108.689			25.2678	0.330977	3.08805	24.2431	99.3286	25.5741	0.0367752	0.816752	24.2973	99.6667
11	2012-06-29	27.2357	0.493579	1.69738	30.3181	84.0464	249.325	27.5093	0	0	30.6211	84.5	154.243			27.1899	0.0096535	0.503778	25.47	98.485	27.4198	0	0	25.4886	98.85
12	2012-06-30	28.7112	0.806917	2.46886	30.725	86.4714	280.621	29.0336	0	0.20654	31.075	86.5	204.996			28.669	0.243807	1.19299	25.9078	96.4	28.6386	0	0.176681	25.5655	98.37
13	2012-07-01	28.7884	1.76008	4.0104	29.2282	86.4667	289.981	29.203	0.0357537	0.807535	29.6612	87	175.811			28.4088	0.0895862	0.514853	25.4639	97.9476	28.9124	0	0	25.6136	99.0952
14	2012-07-02	29.3724	2.29006	4.93836	31.2821	75.9643	361.511	30.058	0.414577	1.44245	31.8656	76.5259	267.396			28.7936	0.317892	1.73359	26.1614	94.285	29.4184	0.02694	0.38165	26.1766	95.4762
15	2012-07-03	29.719	2.03012	4.33237	31.8148	73.1143	405.846	30.6025	0.339577	1.5394	32.6098	73.4222	288.356			29.1976	0.382772	1.66826	25.1831	93.625	30.0759	0.079751	0.550987	25.3601	94.619
16	2012-07-04	29.5062	1.34508	3.06859	31.4544	77.9929	308.529	30.3995	0.0214522	0.517514	32.2092	78.6852	231.322			29.1554	0.465613	1.62224	26.874	94.11	30.0443	0	0.0444724	26.7697	95.7095
17	2012-07-05	30.6436	1.9493	4.26614	33.8656	65.8321	410.486	31.7406	0.462803	1.53874	34.3747	67.237	279.285			29.9522	0.224276	0.717951	28.8181	88.155	30.8044	0	0	28.3439	91.4095
18	2012-07-06	30.0985	2.14446	5.03842	32.0614	72.6607	333.8	31.2174	0.414577	1.59328	32.6228	73.7296	224.752			30.1653	0.476389	1.44578	29.1916	82.195	31.062	0	0	28.8941	85.8667
19	2012-07-07	29.9938	1.03895	2.59618	30.7531	79.7214	312.682	30.899	0.0281041	0.276551	31.3814	80.063	208.359			29.9525	0.494574	1.2682	27.2851	90.965	30.8873	0	0	27.2514	93.0143
20	2012-07-08	29.3497	1.62442	3.79373	30.898	79.9107	239.518	30.2972	0.0419067	0.400774	31.2537	80.8037	178.685			29.1322	0.700889	2.28227	26.5206	93.14	29.8757	0	0.214622	26.4974	95.125
21	2012-07-09	29.3396	1.89719	4.31425	32.5847	71.4964	382.464	30.5729	0.283701	1.27017	33.1706	73.4148	281.278			29.3711	0	0.095188	28.0388	90.055	30.0987	0	0	27.521	93.5136
22	2012-07-10	29.5322	2.58993	5.81696	32.7641	69.775	312.589	30.7817	0.658426	1.87714	32.8286	71.7179	189.282			29.8324	0.392201	1.44713	30.119	79.26	30.6091	0	0	29.4755	84.61
23	2012-07-11	29.4659	1.78802	4.5966	30.4112	85.3296	291.089	30.6766	0.228159	1.23575	30.8812	86.1148	193.041			29.6756	0.533455	1.84582	28.8538	87.4476	30.46	0	0	28.611	90.3952
24	2012-07-12	28.4518	0.838989	2.94191	28.0065	88.5	144.425	29.1231	0.0502535	0.401855	28.2726	90.1385	114.285			28.9362	0.160293	0.886326	28.3662	90.375	29.4891	0	0.0930655	27.7769	94.4409
25	2012-07-13	27.4177	0.422226	2.36806	25.5129	98.7963	93.4963	27.8532	0	0.315509	25.7773	99.2769	67.5			27.6302	0.737215	2.32518	24.7682	98.981	27.8312	0.0338791	0.347567	24.8805	99.5591
26	2012-07-14	26.3667	1.01441	3.21717	23.9517	99.3815	56.6444	26.4586	0.0898	0.813229	23.914	99.684	44.772			26.4537	0.0267262	0.250371	23.7439	99.519	26.508	0	0	23.9515	99.7909
27	2012-07-15	26.0157	0.464328	1.68592	26.6701	83.7414	296.579	26.8967	0	0.00689536	27.3999	83.675	224.371			26.3569	0.0101616	0.0890911	22.5704	98.6632	26.3921	0	0	22.4752	99.04
28	2012-07-16	26.9994	1.7367	3.61848	28.4608	79.5759	383.772	28.2744	0.0482675	0.698035	29.1687	79.325	270.361			27.092	0.343603	1.03057	24.3513	95.0263	27.4352	0	0.0662275	24.1886	96.035
29	2012-07-17	27.1096	1.47106	3.61761	27.3964	81.0556	268.304	27.9844	0	0.182166	27.6661	82.0857	185.089			27.1613	0.373525	1.29654	24.8531	93.9429	27.6196	0	0.0551629	24.5777	96.3429
30	2012-07-18	27.1833	0.857911	2.36415	28.4613	77.9321	382.054	28.1552	0.00715074	0.200221	28.9264	77.9593	285.163			27.1393	0.0096535	0.0756565	23.698	97.3	27.5107	0	0	23.5881	97.83
31	2012-07-19	27.4333	0.45349	1.57118	30.26	76.5714	367.318	28.4208	0	0	30.8069	77.4464	252.289			27.4221	0	0.0289605	23.8191	98.38	27.6923	0	0	23.4967	99.32
32	2012-07-20	28.2777	1.14867	2.803	31.1119	79.9552	367.648	29.5349	0.00689536	0.120268	32.0394	79.7821	261.018			27.9926	0.260645	0.792934	25.5979	96.97	28.2894	0	0.0622186	25.4911	97.7905
33	2012-07-21	29.264	1.4113	3.24178	32.9075	75.9607	441.607	30.7512	0.0143015	0.179267	33.5836	76.7556	319.793			28.8409	1.08972	2.55257	28.3362	90.6	29.0778	0	0.00919381	28.0344	92.6333
34	2012-07-22	29.9105	1.82454	3.93292	33.6367	72.1143	468.482	31.4176	0.0429044	0.538467	34.085	74.2037	343.726			29.478	1.21095	2.92479	29.3199	87.075	29.7657	0	0.0543076	29.0238	89.119
35	2012-07-23	29.8834	2.39638	4.9916	33.0471	70.325	431.157	31.1937	0.400733	1.62378	32.8521	73.7071	310.9			29.4804	1.63167	3.7817	29.1552	87	29.7891	0.0289605	0.699093	28.9763	88.8
36	2012-07-24	29.7026	3.0888	6.39681	32.4157	71.7857	478.657	31.061	0.972726	2.34234	32.3265	74.775	333.257			29.6424	2.02275	4.30411	28.8796	85.445	29.6187	0.15064	0.950084	28.6397	87.655
37	2012-07-25	29.966	2.53573	5.23903	31.6345	70.7571	484.329	31.6358	0.560419	1.83708	32.0802	72.3593	336.174			29.8229	1.95786	4.0071	28.2816	84.155	29.9198	0.232197	1.02115	27.9542	86.4714
38	2012-07-26	29.4833	1.38436	3.2615	32.4394	72.275	390.889	31.0487	0.0490574	0.524499	32.9	74.3741	266.967			29.3921	1.01564	2.75843	27.9252	84.605	29.9156	0	0.0534524	27.5749	87.2905
39	2012-07-27	29.6292	2.22415	4.77832	32.7879	73.7571	437.854	31.299	0.303324	1.19484	33.2275	75.3037	304.663			29.2045	1.18312	3.1677	28.7306	87.595	29.7514	0.0657785	0.42902	28.4215	89.96
40	2012-07-28	29.6442	1.59187	3.73472	33.178	69.5429	483.043	31.358	0.056707	0.807867	33.5241	72.6296	323.578			29.4826	0.895755	2.68345	29.0441	85.895	29.9872	0	0	28.7551	88.4818
41	2012-07-29	30.0573	1.10999	2.68278	34.0799	69.3536	438.032	31.6832	0.00715074	0.483257	34.5334	72.2741	305.159			29.9658	0.688991	1.85437	29.1602	84.995	30.3844	0	0.02694	28.8222	87.9333
42	2012-07-30	30.1538	1.88917	4.01342	33.4625	69.1464	469.689	31.7644	0.249278	0.856093	33.9133	70.8704	317.252			29.7294	1.60338	3.65306	29.1341	86.045	30.1941	0.0177462	0.337391	28.7697	88.7
43	2012-07-31	29.2661	2.56154	5.19236	31.964	69.5036	479.189	30.9323	0.387803	1.76806	32.1868	71.8444	320.904			29.1717	1.57666	4.0538	28.5938	82.335	29.5287	0.0536662	0.763941	28.1987	85.1571
44	2012-08-01	29.0662	2.32245	5.03858	31.2918	69.9964	344.954	30.3885	0.16746	1.54589	31.8478	71.6333	302.667			29.0597	1.5486	4.22105	27.6856	82	29.1159	0	0.586052	27.2872	85.2619
45	2012-08-02	28.2442	1.29179	4.18219	28.6287	88.0185	202.241	28.5788	0.307244	1.73763	28.5091	90.9179	146.35			28.2953	0.570444	2.55609	26.0085	95.5238	28.2658	0.046696	0.298361	25.7836	97.735
46	2012-08-03	27.8479	2.3812	5.81189	29.0055	88.9741	148.922	28.1	0.629764	2.2919	28.9243	90.9926	109.052			27.7985	1.72266	4.30377	26.5845	96.3714	27.8468	0.488127	1.3671	26.4641	97.2238
47	2012-08-04	28.4816	3.70778	7.69281	30.7728	78.5107	453.893	29.3888	1.37327	3.20303	30.9618	80.1852	326.407			28.108	2.94409	6.33651	27.8693	87.095	28.2075	0.834285	2.4417	27.5761	89.281
48	2012-08-05	28.656	2.37585	5.14554	30.4792	75.3964	420.804	29.6951	0.470452	1.68525	31.0048	77.0852	324.889			28.3714	1.58452	3.9411	26.8175	86.16	28.539	0.142611	0.656181	26.4191	89.4762
49	2012-08-06	28.3542	1.47881	4.04693	30.5895	73.4071	396.339	28.9513	0.539465	2.10548	30.6646	75.0481	250.626			27.8088	0.635335	2.683	26.4405	86.46	27.9887	0	0.38165	26.0151	89.8476
50	2012-08-07	28.3193	1.56901	4.40402	30.5112	76.7815	396.6	28.7758	0.429211	1.86352	30.3835	79.4111	262.533			27.469	0.570444	2.69913	26.1872	89.0333	27.6357	0	0.656609	25.8657	91.5524
51	2012-08-08	26.8923	3.1392	8.5367	26.0186	96.9654	78.9423	26.9805	1.61856	4.74826	25.9346	98.792	54.92			26.8319	3.34485	8.5808	26.0047	95.6273	26.829	0.806159	4.31203	25.8042	96.9818
52	2012-08-09	26.5368	2.58054	5.8629	26.8478	96.2192	121.204	26.4925	1.76026	4.74126	26.876	96.952	103.224			26.3892	2.95748	6.6999	26.3382	98.2864	26.2725	1.61783	5.19228	26.2563	98.8273
53	2012-08-10	26.9751	1.64366	3.84055	28.5655	91.8536	122.182	26.9649	0.793732	2.63114	28.6056	92.863	93.8185			26.8218	2.32066	5.06831	26.2565	96.195	26.7064	1.13661	3.31982	26.187	97.6
54	2012-08-11	27.4887	1.54162	3.55504	29.4513	87.2462	268.796	27.9034	0.301866	1.28345	29.8928	89.0038	187.885			27.2465	0.864937	2.14398	26.3664	98.0273	27.1889	0.178988	0.822486	26.153	99.15
55	2012-08-12	28.2967	0.84279	2.4848	30.8778	80.7407	345.996	28.703	0.0281041	0.338247	31.6687	83.2259	275.952			28.1003	0.0446862	0.25764	26.3918	99.0143	27.9528	0	0	26.2071	99.5857
56	2012-08-13	29.0709	0.8101	2.35725	31.6039	81.7269	393.273	29.6404	0.0848111	0.669343	32.1651	84.0704	268.552			28.6589	0.128373	1.09209	27.0431	96.4591	28.4757	0	0	26.6476	98.6905
57	2012-08-14	29.0743	0.84602	2.62406	31.4795	84.8	303.8	29.4106	0.00715074	0.124223	31.883	85.8593	187.752			28.7086	0.204091	1.14434	27.2792	95.8227	28.4909	0	0	26.9539	98.0667
58	2012-08-15	29.1599	0.938743	2.74006	31.1825	85.5185	353.874	29.4874	0.0214522	0.6138	31.3456	87.4481	195.211			28.7163	0.384643	1.60721	27.3402	96.481	28.6518	0.0177462	0.16891	27.1298	98.281
59	2012-08-16	28.7576	0.974675	3.12452	30.2345	88.15	265.2	28.9406	0.0647596	0.30791	30.4053	89.8577	185.769			28.6282	0.73738	2.5493	27.2372	97.3136	28.3989	0.127965	0.729013	27.0308	99.1727
60	2012-08-17	29.1885	1.5772	3.49926	31.7228	82.8538	327.312	29.6015	0.0715074	0.655374	32.1826	84.1148	225.77			29.0411	0.669826	2.08275	28.3835	94.3591	28.6073	0	0.00919381	27.813	96.3905
61	2012-08-18	29.7554	0.710456	2.27971	33.3353	79.2038	398.177	30.3189	0.00742577	0.295131	33.9342	81.0038	262.542			29.2419	0.424713	1.48252	27.7182	94.9	29.1051	0.0512268	0.271237	27.5023	96.9909
62	2012-08-19	29.0749	0.804919	2.86048	31.4609	84.3308	343.796	29.527	0.0148515	0.259038	32.0384	86.5154	249.377			28.7063	0.56023	2.20316	25.2974	97.5273	28.5253	0.0506145	0.31328	25.122	99.6636
63	2012-08-20	29.0871	0.538627	1.80636	31.7091	78.8654	424	29.3523	0.00742577	0.603214	32.1146	81.0423	295.919			28.6839	0.279605	1.1772	25.8591	94.2045	28.3811	0.0263277	0.253685	25.6905	96.3364
64	2012-08-21	28.7587	0.785563	2.39205	30.4555	84.8458	343.704	28.8561	0.113617	0.53431	31.16	85.3739	234.104			28.2216	0.313688	1.76151	24.7905	99.6455	28.0272	0.0595945	0.533902	24.9259	99.8045
65	2012-08-22	25.7665	0.852064	3.24765	23.0222	90.9115	95.8654	25.53	0.453145	1.67667	23.0568	93.55	61.8769			25.8904	0.51737	2.77849	21.8088	89.9	25.4971	0.373282	1.37251	21.569	92.4273
66	2012-08-23	24.716	1.15462	3.46887	24.4453	77.5962	265.046	24.6535	0.329925	1.49104	24.674	80.184	195.876			24.6363	0.240011	1.88111	21.6892	85.1318	24.158	0.0169395	0.373486	21.4242	88.5273
67	2012-08-24	25.0278	0.531892	2.22203	26.2551	81.2577	270.912	25.0612	0.0303524	0.603636	26.4858	83.28	169.832			25.0367	0.00877591	0.567577	23.2295	90.8273	24.6435	0	0.0169395	22.9349	94.45
68	2012-08-25	26.2452	1.04738	3.07444	27.5153	88.2423	235.581	26.3511	0	0	27.9219	89.4885	158.227			25.8767	0.288789	1.74457	24.6599	98.4955	25.5641	0	0	24.3878	99.9682
69	2012-08-26	27.056	1.61346	3.66868	29.4494	78.7115	421.731	27.4292	0.194624	0.852927	30.0924	79.6269	285.823			26.4799	0.620232	2.61032	25.6681	92.85	26.2847	0	0.254093	25.2357	94.8955
70	2012-08-27	26.6472	1.48429	4.11353	28.5724	84.3462	303.312	26.785	0.609777	2.0445	28.5758	86.4615	190.288			26.5977	0.787383	2.66869	25.0333	94.3364	26.2212	0.0263277	0.398794	24.7685	96.1091
71	2012-08-28	26.1156	1.85696	4.02857	25.9565	92.8808	236.065	26.184	0.127875	0.79006	26.4872	93.776	152.22			26.2713	0.916572	2.46521	24.277	96.75	25.8451	0.0175518	0.559005	24.0905	98.4045
72	2012-08-29	26.5179	0.50996	1.8428	29.6047	79.3846	390.096	26.7962	0	0.244014	30.1663	81.0115	280.058			26.2322	0	0.0432673	23.6868	98.75	25.8432	0	0	23.5831	99.4364
73	2012-08-30	27.2067	0.787477	2.10719	29.9446	79.2077	364.131	27.3954	0.00742577	0.186853	30.4297	81.0385	242.746			26.6583	0.119393	0.619008	25.1815	95.9818	26.4638	0	0.101433	24.8507	97.8182
74	2012-08-31	27.2787	2.3146	4.98943	29.1376	81.9654	384.619	27.6257	0.381823	1.6423	29.5897	83.1808	268.085			26.6897	1.22761	3.43056	25.6541	91.0182	26.5824	0.0175518	0.501043	25.2338	93.5591
75	2012-09-01	26.5542	2.83043	5.88484	27.9966	78.9423	391.781	26.9613	0.678529	2.1261	28.5697	79.92	272.076			26.0181	1.77926	4.12488	24.9299	87.0045	25.9644	0.0520432	0.635131	24.5289	89.7864
76	2012-09-02	26.9015	1.84988	4.1149	29.1345	79.4917	427.029	27.1939	0.0316171	0.309997	29.9272	80.3542	284.179			26.3535	1.26655	3.39332	24.116	96.0542	26.2889	0.00804458	0.186335	24.0721	97.4917
77	2012-09-03	25.5789	0.93261	2.88857	23.2785	97.925	124.533	25.2711	0	0.188041	23.706	98.824	82.284			25.6355	0.281935	1.78534	22.9744	98.7292	25.1961	0	0.0316171	22.9061	99.9708
78	2012-09-04	24.257	0.582491	2.36485	22.8127	83.4654	179.169	23.8123	0	0	22.869	86.652	138.424			24.1764	0.111638	0.711053	20.3525	98.5818	23.3692	0	0	20.1478	99.7318
79	2012-09-05	23.9164	1.22594	3.01728	25.4926	71.3346	424.477	24.072	0.0684276	0.536824	26.6306	73.096	314.372			23.5166	0.0430632	0.390018	19.3136	97.6182	23.0935	0	0.0406052	19.0452	99.4478
80	2012-09-06	24.0715	1.89841	4.47912	25.4186	87.4538	184.804	24.1818	0.0838732	1.00594	25.7477	88.332	123.18			24.0169	1.1525	3.34587	23.6023	93.2182	24.0135	0	0.446267	23.1579	96.0957
81	2012-09-07	24.9879	1.11248	3.02384	26.8399	86.7654	224.035	25.0725	0.173556	0.904217	27.1897	88.0346	186.635			24.7841	0.813302	2.2201	23.4198	97.1409	24.6411	0	0.33124	23.2023	98.8273
82	2012-09-08	24.396	1.5733	3.9882	24.7589	89.348	167.12	24.444	0.0833344	1.00594	24.9928	90.488	114.836			24.2398	0.422255	2.09839	21.9149	98.8609	24.0702	0.00839435	0.324842	21.79	99.3783
83	2012-09-09	23.245	0.0321783	1.3919	21.4346	99.9125	50.1042	22.967	0	0.234041	21.4882	100	31.5083			23.3974	0.0321783	1.50733	21.158	99.6208	23.0884	0	0.0701562	21.0744	100
84	2012-09-10	23.926	1.24298	3.38509	24.55	83.9708	321.458	23.9345	0.140874	0.823541	25.2971	84.7958	207.821			23.6842	0.351155	1.57693	21.8191	94.1542	23.3039	0	0.155279	21.6303	95.9208
85	2012-09-11	24.0823	1.84162	4.115	25.4831	84.688	322.22	24.1427	0.204026	1.22218	26.1161	85.02	219.728			24.0824	1.31147	3.13617	22.5301	93.3261	23.7281	0	0.25105	22.1761	95.813
86	2012-09-12	24.1628	1.13447	3.13701	24.2881	93.9917	128.438	24.1119	0.0637954	0.644315	24.5446	95.3375	90.3625			23.8484	0.442826	1.66934	22.2423	98.3042	23.6279	0	0.109444	22.1306	99.4125
87	2012-09-13	22.1282	1.04916	3.01279	19.2947	89.8333	67.5458	21.892	0.0782008	0.644502	19.269	92.7167	43.2875			22.3626	0.365187	1.70788	19.4628	98.925	22.0755	0.0475192	0.48941	19.4006	99.7333
88	2012-09-14	21.6518	0.418468	1.7969	21.0503	76.632	258.772	21.3549	0.038614	0.617824	21.348	80.968	154.428			20.9801	0.0335774	0.356467	16.3574	99.1478	20.4911	0	0	16.3557	99.5
89	2012-09-15	20.7835	1.16363	3.08607	22.897	68.116	458.072	20.6797	0.195876	1.41323	23.6169	69.5458	353.746			20.3741	0.356662	1.2	16.1064	88.9043	19.7537	0.00804458	0.209346	15.5929	91.9542
90	2012-09-16	20.8982	1.37232	3.75705	23.2078	72.792	431.676	20.6987	0.791362	2.16493	23.2772	74.1292	339.946			20.3653	0.0570035	0.348853	15.0382	94.713	19.7046	0.00804458	0.0933546	14.8298	96.4375
91	2012-09-17	20.1669	1.38777	3.62253	21.7087	67.668	356.972	20.0753	0.559753	1.71612	21.8879	70.2833	227.029			19.6032	0	0.0974135	13.9532	98.5261	19.0056	0	0	13.87	98.8875
92	2012-09-18	20.2871	0.945774	2.60887	22.7716	69.512	359.576	20.1687	0.11094	0.792298	23.8439	71.25	245.317			19.6328	0.00839435	0.194632	14.5987	98.0391	19.0554	0	0	14.5566	98.5542
93	2012-09-19	20.8574	0.730433	2.06468	24.5389	65.828	400.12	20.8274	0.0959738	0.682854	25.6489	67.275	306.1			20.1764	0.00839435	0.064617	15.4779	98.0174	19.6476	0	0	15.3787	98.6625
94	2012-09-20	21.537	0.612077	2.15466	25.384	67.976	362.116	21.2234	0.0241337	0.543103	26.2775	69.0875	242.292			20.9075	0.292045	0.892143	17.8727	94.313	20.3207	0	0.0624858	17.4916	96.8833
95	2012-09-21	21.9036	1.10278	2.7389	22.7011	94.3435	95.8913	21.4784	0.0391004	0.256117	22.6771	96.3083	57.7583			21.7	0.862267	2.19018	21.3699	97.9333	21.1949	0	0.132268	21.0836	99.4375
96	2012-09-22	21.3368	1.42894	3.61875	20.0065	98.3417	68.0042	20.9803	0	0.388572	20.1247	99.2958	47.1375			21.2028	0.412145	1.56813	19.5469	97.4125	20.7627	0	0.00804458	19.293	99.3458
97	2012-09-23	22.0742	1.29798	3.25394	23.3518	81.1625	365.633	21.7983	0.157898	0.954686	24.1971	81.075	242.771			21.5004	0.147796	0.932423	19.6855	94.6292	20.882	0	0	19.1349	97.2625
98	2012-09-24	22.6878	1.4914	3.32493	24.9999	68.82	365.624	22.2576	0.188954	0.993413	25.9276	69.4917	238.283			21.9326	0.423036	1.64529	20.3556	89.5217	21.318	0.00804458	0.210469	19.5494	93.6208
99	2012-09-25	22.6926	2.38455	5.06957	24.0177	74.912	400.436	22.1728	0.652734	1.81714	24.7965	74.9542	240.421			21.893	0.980187	2.52026	20.1353	88.6957	21.1776	0	0.171368	19.5092	92.2958
100	2012-09-26	22.6522	2.10994	4.64446	25.0008	77.292	335.724	22.3247	0.536555	1.55504	25.6027	77.3792	211.933			22.1647	0.900619	2.82608	20.8531	91.7625	21.4179	0.0241337	0.373044	20.3005	94.8833
101	2012-09-27	23.4002	1.2804	3.29342	25.3793	78.7208	306.729	23.116	0.181658	1.0095	26.0362	78.9917	169.325			22.8081	0.481553	1.38198	20.4763	96	21.9903	0	0.0391004	20.2577	97.6792
102	2012-09-28	21.1341	0.861616	2.39781	21.0643	82.5172	262.434	21.335	0.293454	0.891586	22.6788	91.3143	176.514			21.5069	0	0.0338791	16.9671	100	20.3291	0	0	16.9212	100
103	2012-09-29	19.0441	0.857291	2.7404	19.5879	61.7233	383.417	19.9681	0.358826	1.47684	21.1841	53.8083	246.254			19.0848	0	0.0699692	11.0465	97.125	17.9105	0	0	11.1092	98.0667
104	2012-09-30	18.1948	0.732768	2.34902	19.5957	63.5933	370.287	19.2329	0.312242	1.21847	21.3386	57.0042	235.633			18.0789	0	0.00804458	10.3418	97.7792	16.9887	0	0.00804458	10.4353	98.3542
105	2012-10-01	17.905	0.261767	0.957867	19.9848	63.0233	374.543	19.0161	0.112063	0.690525	22.3828	55.5958	238.596			17.7693	0.00804458	0.202424	10.4041	96.8542	17.81	0	0.047145	10.4681	97.4542
106	2012-10-02	18.3743	0.746238	2.11898	20.9094	63.85	332.583	19.1901	0.180381	0.849781	23.1883	55.3913	232.204			18.2582	0	0.0780138	11.3087	97.4042	18.13	0	0.0160892	11.5424	96.5708
107	2012-10-03	18.4369	1.04363	2.603	20.1697	70.4367	270.92	19.6333	0.25724	0.924753	22.2348	62.9	209.742			18.3961	0.0780138	0.350594	13.3312	96.5958	18.37	0	0	13.1967	98.2417
108	2012-10-04	18.4314	0.460674	1.55399	21.4901	73.7267	267.003	19.6566	0.0643567	0.628787	23.3781	66.2333	192.712			18.059	0	0.1405	13.1193	97.6792	17.6104	0	0.00804458	13.1491	98.1375
109	2012-10-05	18.566	0.367378	1.33882	20.0509	86.2607	123.214	19.1827	0	0.0936777	20.9991	83.9	63.7591			18.5685	0	0.0701563	16.663	98.7417	18.4159	0	0	16.5687	99.2625
110	2012-10-06	19.687	0.981813	2.6955	22.094	67.24	346.207	20.609	0.301611	1.19063	23.8471	60.5609	223.287			19.1573	0.0389133	0.186709	15.6749	95.6875	18.6527	0	0.03143	15.5159	97.2792
111	2012-10-07	19.774	1.30569	3.20541	21.3956	73.5033	280.54	20.7049	0.317619	1.19063	23.1925	70.1957	187.687			19.3535	0.885465	2.68652	18.1904	82.2583	18.7926	0.0557508	0.652547	17.7919	85.125
112	2012-10-08	19.7405	0.950234	2.55975	21.0169	68.6967	339.33	20.3677	0.205564	1.23085	22.7593	61.2826	189.652			19.3009	0.334131	1.14383	15.8388	88.6458	18.5735	0	0.0155279	15.6507	90.9083
113	2012-10-09	19.4559	0.503329	1.67118	21.5272	73.9667	272.503	20.3911	0.0587604	0.696731	23.7134	66.4217	143.839			19.1334	0.30401	1.10342	15.9511	92.9125	18.3822	0	0	15.7865	94.3
114	2012-10-10	18.757	0.733516	2.2248	20.885	68.9967	299.287	19.587	0.349634	1.12738	22.8871	62.5348	288.404			18.5448	0.00804458	0.218888	12.7109	93.4875	18.6	0	0.00804458	12.6116	95.8917
115	2012-10-11	18.3529	1.19299	3.05036	20.1133	64.52	340.497	18.6314	0.244022	1.1022	21.6664	60.7348	288.074			17.9033	0.310745	0.816057	12.5522	91.1958	17.8	0.0241337	0.232732	12.4159	92.7625
116	2012-10-12	19.1352	1.89633	4.35654	20.5565	65.9931	312.521	19.3339	0.446853	1.33704	21.94	60.4391	289.978			18.404	0.946829	2.46838	16.8692	76.6708	17.814	0.0160892	0.100838	16.7818	78.1042
117	2012-10-13	19.0211	1.87073	3.99369	20.2205	79.8429	162.232	19.3296	0.466348	1.39741	20.584	76.9909	119.945			18.9727	0.885091	2.4087	18.623	84.0208	18.6735	0.0316171	0.132268	18.398	85.5958
118	2012-10-14	19.8673	1.75671	3.88674	22.2246	73.1464	258.393	20.8744	0.33124	1.18658	23.7893	67.7364	144.945			19.4312	0.982792	2.69486	19.4323	78.1962	19.2049	0.0235725	0.365935	18.8589	81.7125
119	2012-10-15	19.9273	2.71196	5.59733	21.9585	74.4897	273.383	20.3813	0.665496	1.83036	23.3636	70.0696	168.896			19.5186	1.67926	3.80285	19.4734	76.936	19.0453	0.109444	0.512795	18.8859	80.3208
120	2012-10-16	19.1205	1.37779	3.54085	18.9806	87.0429	104.464	19.3014	0.0432673	0.525534	19.9387	90.0091	134.32			19.1501	1.76319	4.13494	18.0617	92.5462	18.6596	0.186896	0.67668	17.9482	93.3667
121	2012-10-17	18.4978	1.17607	3.35418	16.7878	62.6793	354.897	18.6507	0.487653	1.75051	18.6042	55.8652	223.452			18.3986	0.366025	2.09593	12.7742	96.184	18.2	0.03143	0.372296	12.8326	96.525
122	2012-10-18	16.4329	1.03363	2.82096	17.2793	63.1586	350.752	16.4118	0.108541	0.769937	18.3819	59.0304	204.7			16.3638	0.119614	0.477556	9.2452	87.46	16.8	0	0	8.79396	90.4208
123	2012-10-19	16.9419	2.51616	5.13143	19.0983	70.8786	340.439	16.6448	0.793559	2.30981	19.9765	65.9043	201.339			16.4485	1.16878	2.52321	13.731	84.9115	16.28	0.101399	0.61382	13.1825	87.5083
124	2012-10-20	18.4174	0.685848	1.99741	22.357	69.5143	257.45	19.0098	0.0438795	0.431448	23.5547	65.4136	172.1			18.0545	0.230026	0.824606	15.6903	93.0615	17.4768	0	0.0233854	15.4045	95.0542
125	2012-10-21	19.0962	1.3377	3.20185	21.8886	76.8607	212.225	20.0051	0.0351036	0.296748	23.9812	72.8636	150.409			18.6947	0.00742577	0.194106	16.9525	94.2962	18.4081	0	0	16.6705	96.1958
126	2012-10-22	17.4139	1.2299	3.33894	15.2783	89.936	113.628	18.0242	0.210282	1.59395	16.3277	89.7778	102.71			17.9904	0.501671	1.74264	15.1722	95.0077	17.495	0	0.187083	15.3928	96.9833
127	2012-10-23	16.354	0.745821	1.95684	17.1252	65.9607	322.361	16.6111	0.0608191	0.803914	18.4256	59.7682	223.291			16.265	0.029185	0.251095	8.73244	95.6346	16.07	0	0	8.72847	96.7
128	2012-10-24	16.3049	0.572956	1.65104	17.4214	71.5964	168.475	16.6527	0	0.271645	18.4511	68.4864	129.15			15.9534	0.0507715	0.538455	11.8184	93.1038	16.12	0	0.0389133	11.6106	95.3333
129	2012-10-25	16.5968	0.688006	1.90687	16.9829	78.2692	142.354	16.4937	0	0	17.6547	78.5	104.95			16.3585	0	0.0573338	14.2382	89.9462	15.7846	0	0	14.1737	93.7462

## Sheet: Table 2-Grain yield
		Panicle number			Spikelet number per panicle			1000-grain weight (g)			Seed-setting rate (%)			Grain yield (kg/hm2)
	Treatment	R1	R2	R3	R1	R2	R3	R1	R2	R3	R1	R2	R3	R1	R2	R3
Year of 2011	OFC-SXJ3	402.584	407.713	387.199	120.25	124.94	125.994	20.48	20.67	20.24	82.468	82.47	81.48	6821.77	6536.04	6375.32
	IPNC-SXJ3	356.428	353.864	341.043	121.347	119.375	126.183	19.68	19.2	19.34	75.7339	76.4684	80.0273	5035.74	4940.72	4826.71
	OFC-NJ44	251.295	248.73	261.552	140.202	137.79	139.284	27.18	27.54	27.5	86.4687	85.92	81.77	8180.35	7933.09	8454.28
	IPNC-SXJ3	223.088	228.217	220.524	145.503	141.795	138.895	26.64	25.18	26.62	80.5121	82.1635	82.0579	6264.05	6302.82	6222.84
Year of 2012	OFC-SXJ3	483.575	480.24	480.907	94.3568	94.4532	94.3651	19.9824	20.2824	20.4916	78.8231	80.8503	78.911	6921.81	7398.38	6790.99
	IPNC-SXJ3	410.205	406.87	405.202	89.0076	91.6925	91.8661	19.44	19.33	19.24	76	75.932	75	5405.32	5295.83	4839.41
	OFC-NJ44	292.813	285.645	287.477	139.964	143.053	130.5	27.4674	27.3953	27.1604	83.2038	83.6937	83.6086	8758.56	8481.08	8731
	IPNC-SXJ3	264.132	256.795	254.46	125.244	126.368	125.243	26.1749	26.2058	26.1304	82.2094	81.8054	82.5979	6476.35	6331.56	6536.78

## Sheet: Table 3-Tillerng traits
			Maximum tiller number (10000/hm2)	Tiller survival	Time of tillering onset (d)	Time of tillering cessation (d)	Tillering duration (d)	Initial tillering rate (10000/hm2/d)	Tillering rate (10000/hm2/d)
Year of 2011	OFC-SXJ3	R1	504.906	0.797345	26.843	52.0489	25.2059	0.17434	16.025
		R2	512.588	0.7954	26.998	52.188	25.19	0.17445	16.2791
		R3	489.27	0.791381	26.4486	52.2904	25.8418	0.17005	15.1466
	IPNC-SXJ3	R1	463.392	0.769172	26.2155	53.6103	27.3948	0.16041	13.5323
		R2	465.581	0.760049	25.9879	54.1373	28.1494	0.15611	13.2317
		R3	452.196	0.754192	26.0999	54.3216	28.2217	0.15571	12.8184
	OFC-NJ44	R1	295.199	0.851272	23.6463	46.5172	22.8708	0.19214	10.3258
		R2	294.356	0.844998	23.48	47.6065	24.1265	0.18214	9.76043
		R3	306.404	0.853617	23.6811	47.0232	23.3422	0.18826	10.5013
	IPNC-NJ44	R1	277.495	0.803935	22.0356	51.7556	29.72	0.14786	7.46959
		R2	279.066	0.817787	22.5452	50.2928	27.7477	0.15837	8.04582
		R3	269.43	0.818481	22.0641	49.4435	27.3794	0.1605	7.87249
Year of 2012	OFC-SXJ3	R1	624.147	0.774777	30.9077	56.1354	25.2276	0.17419	19.7925
		R2	616.291	0.779242	30.8212	55.9896	25.1684	0.1746	19.5894
		R3	616.339	0.780264	30.8164	55.9488	25.1324	0.17485	19.6189
	IPNC-SXJ3	R1	569.777	0.719939	30.7698	59.1135	28.3437	0.15504	16.082
		R2	574.616	0.708073	30.8591	59.4294	28.5703	0.15381	16.0899
		R3	582.668	0.695426	30.9837	59.7598	28.7761	0.15271	16.1987
	OFC-NJ44	R1	355.535	0.823585	27.4286	52.7157	25.2871	0.17378	11.2479
		R2	354.994	0.804648	27.4269	53.2035	25.7766	0.17048	11.0175
		R3	356.791	0.80573	27.476	54.1249	26.6489	0.1649	10.7109
	IPNC-NJ44	R1	330.055	0.800267	26.9515	56.23	29.2784	0.15009	9.01837
		R2	330.573	0.776817	26.9637	56.3891	29.4255	0.14934	8.9874
		R3	337.48	0.754001	27.1245	57.7945	30.67	0.14328	8.80287
